# Supplementary material
Source: PubMed Central journal article supplement (PMC10173203)

A

| RBS mAb<br>VH/VK or VL/JH            | 2D Class/<br>3D Reconstruction | RBS mAb<br>VH/VK or VL/JH               | 2D Class |
|--------------------------------------|--------------------------------|-----------------------------------------|----------|
| SFV009 2G01<br>VH4-59/<br>VK3-11/JH6 |                                | 240 IgA 1A03<br>VH4-38-2/<br>VL3-21/JH4 |          |
| SFV018 2D01<br>VH5-10/<br>VK3-20/JH6 |                                | 051-09 4B03<br>VH3-15/<br>VK2-28/JH4    |          |
| SFV019 4D02<br>VH4-59/<br>VL3-21/JH6 |                                | 240 IgG 1F05<br>VH3-11/<br>VL1-44/JH6   |          |
| 029-09 3A02<br>VH1-02/<br>VL3-1/JH3  |                                | 240 IgG 1E01<br>VH4-59/<br>VK1-5/JH6    |          |

B

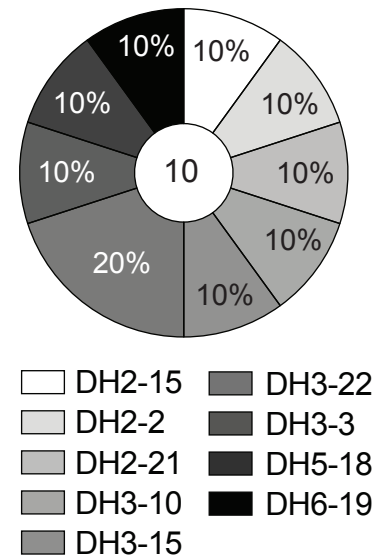

C

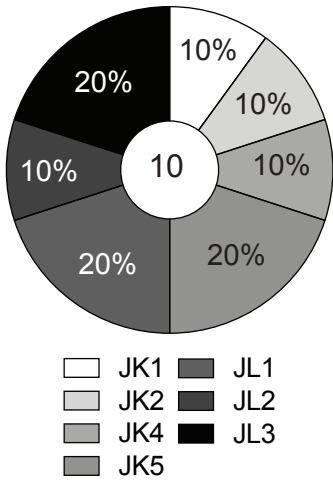

D

|     |                  |                             |
|-----|------------------|-----------------------------|
| JH3 | 029-09-3A02      | AKDRA-WLVYDDG-----SDV       |
| JH6 | SFV018-2D01      | --TRD----SFY-DVDLSSFY--MDV  |
| JH6 | SFV009-2G01      | --ARD---CSGFE-DMDSFYF--MDV  |
| cl2 | JH6 SFV019-4C05  | --ARG--VSALV-SVDYYYY--MDV   |
| cl2 | JH6 SFV019-4D01  | --ARA--VSTLV-SVDYFYY--IDV   |
| cl2 | JH6 SFV019-4D02  | --ARG--VSALV-SVDYYYY--MDV   |
| cl2 | JH6 SFV019-1F01  | --ARG--VSALV-SVDYYYY--MDV   |
| cl2 | JH6 SFV019-1F03  | --ARG--VSALV-SVDYYYY--MDV   |
| cl3 | JH6 240-IgG-1E01 | --ARA-----DFDVEGYG-LDV      |
| cl3 | JH6 240-IgG-2G04 | --ARA-----DYDVEGYFG-MDV     |
| cl1 | JH4 051-09-4B03  | -TTNA-----NTDYYDTHGLSNY     |
| JH4 | 051-09-5B06      | -SSTA-----DRDYYDTAGFLDF     |
| cl1 | JH4 051-09M-1F06 | -TTHG-----VTDYYDTHGLSDY     |
| cl5 | JH4 240-IgA-1A01 | --TRIYM-----VRDLEIYY--FDS   |
| cl5 | JH4 240-IgA-1A03 | --TRIYM-----VRDLEIYY--FDS   |
| cl5 | JH4 240-IgA-1B04 | --ARIYM-----VRDLEIYY--FDS   |
| cl5 | JH4 240-IgA-1C06 | --ARIYM-----VRDLEIYY--FDS   |
| cl5 | JH4 240-IgA-1E03 | --TRIYM-----VRDLEIYY--FDS   |
| cl5 | JH4 240-IgA-1G03 | --ARIYM-----VRDLEIYY--FDS   |
| cl5 | JH4 240-IgA-2F05 | --ARIYM-----VRDLEIYY--FDS   |
| JH6 | 240-IgG-1A06     | --TRIRWDC---GGDCYWTH--DF    |
| cl4 | JH6 240-IgG-1F05 | --ARALRYCSSNSCPESYYYYYG-MDV |
| cl4 | JH6 240-IgG-2A05 | --ARALRYCSTNSCPESYSYYG-MDV  |
| cl4 | JH6 240-IgG-2D05 | --ARALRKCSSNSCPESYYYYYG-MDV |
| cl4 | JH6 240-IgG-2B02 | --ARALRSCSSNSCPESYYYYYG-MDV |

E

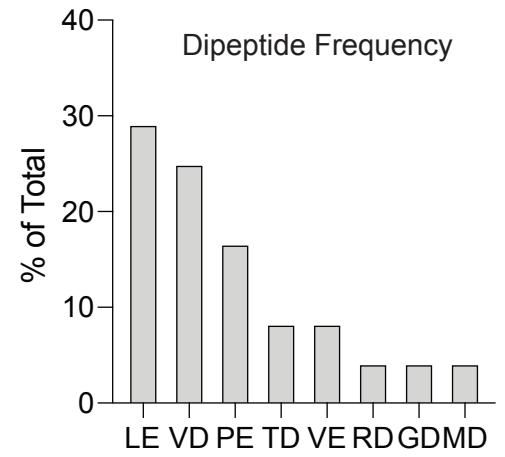

F

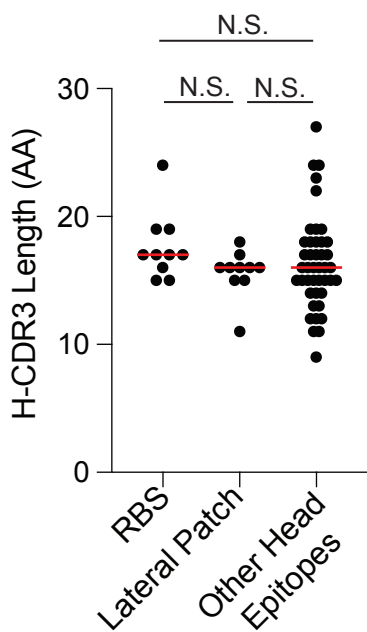

G

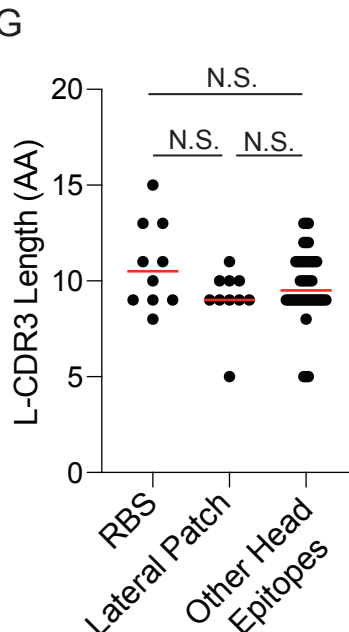

H

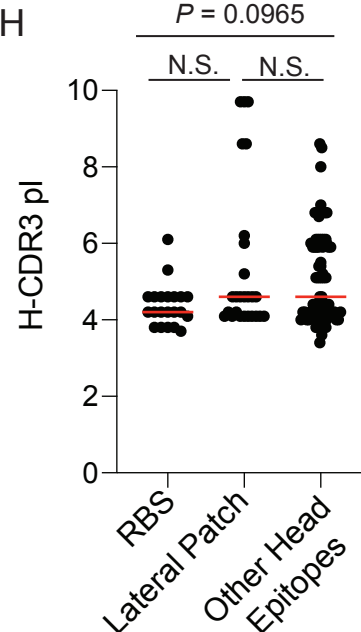

I

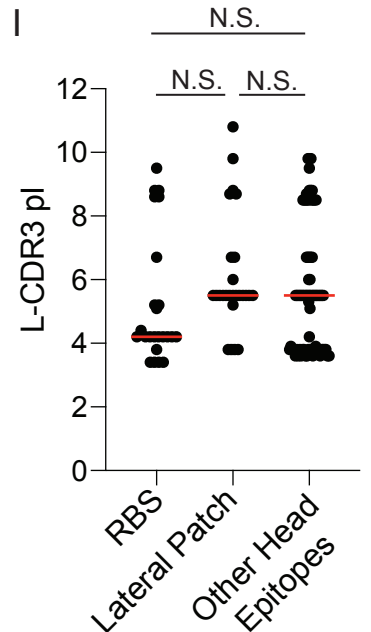

Supplement: NIHMS1894197-supplement-Figure_S3.pdf [file NIHMS1894197-supplement-Figure_S3.pdf]
