# Supplementary material
Source: PubMed Central journal article supplement (PMC10173203)

**A**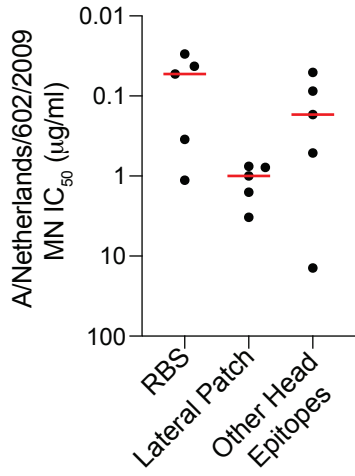**B**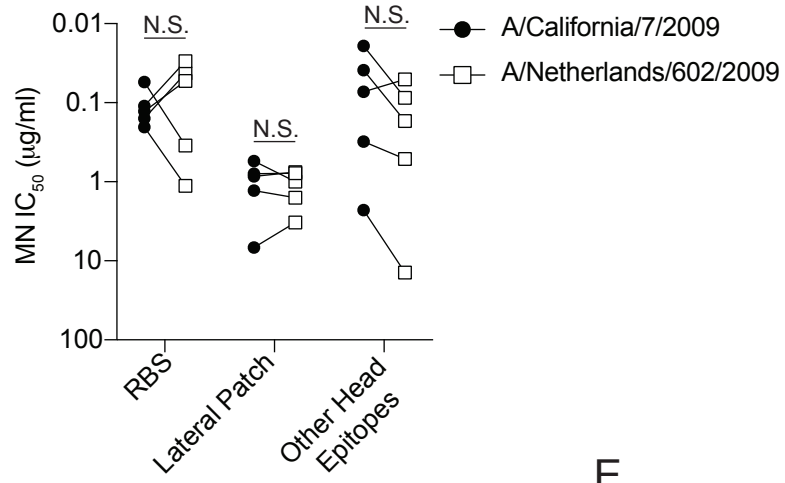**C**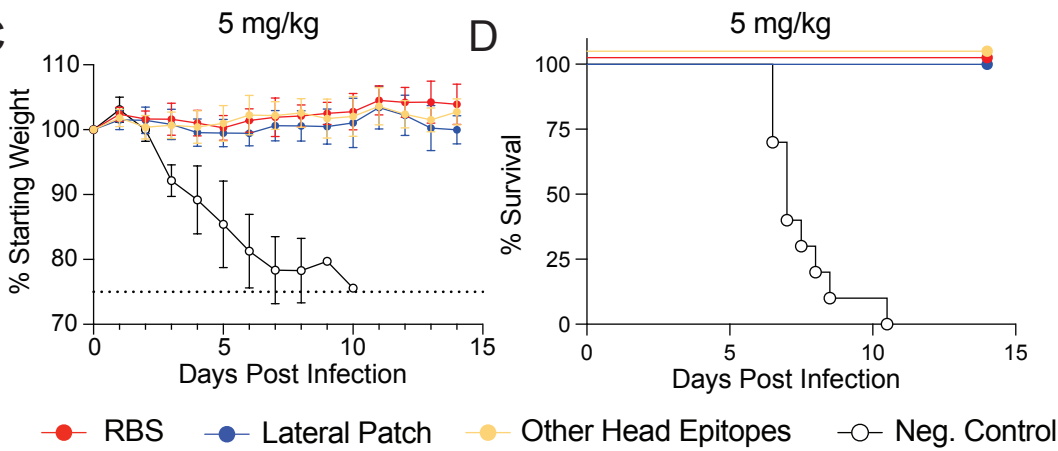**D**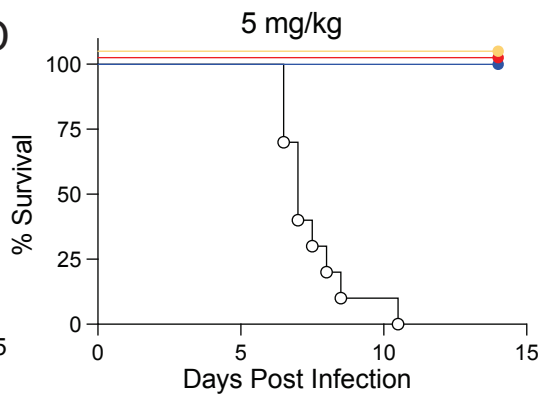**E**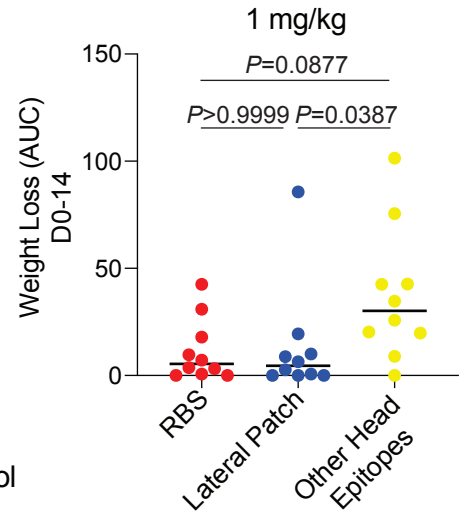

Supplement: NIHMS1894197-supplement-Figure_S7.pdf [file NIHMS1894197-supplement-Figure_S7.pdf]
